# Supplementary material
Source: PubMed Central journal article supplement (PMC7224446)

Celtic locus

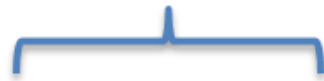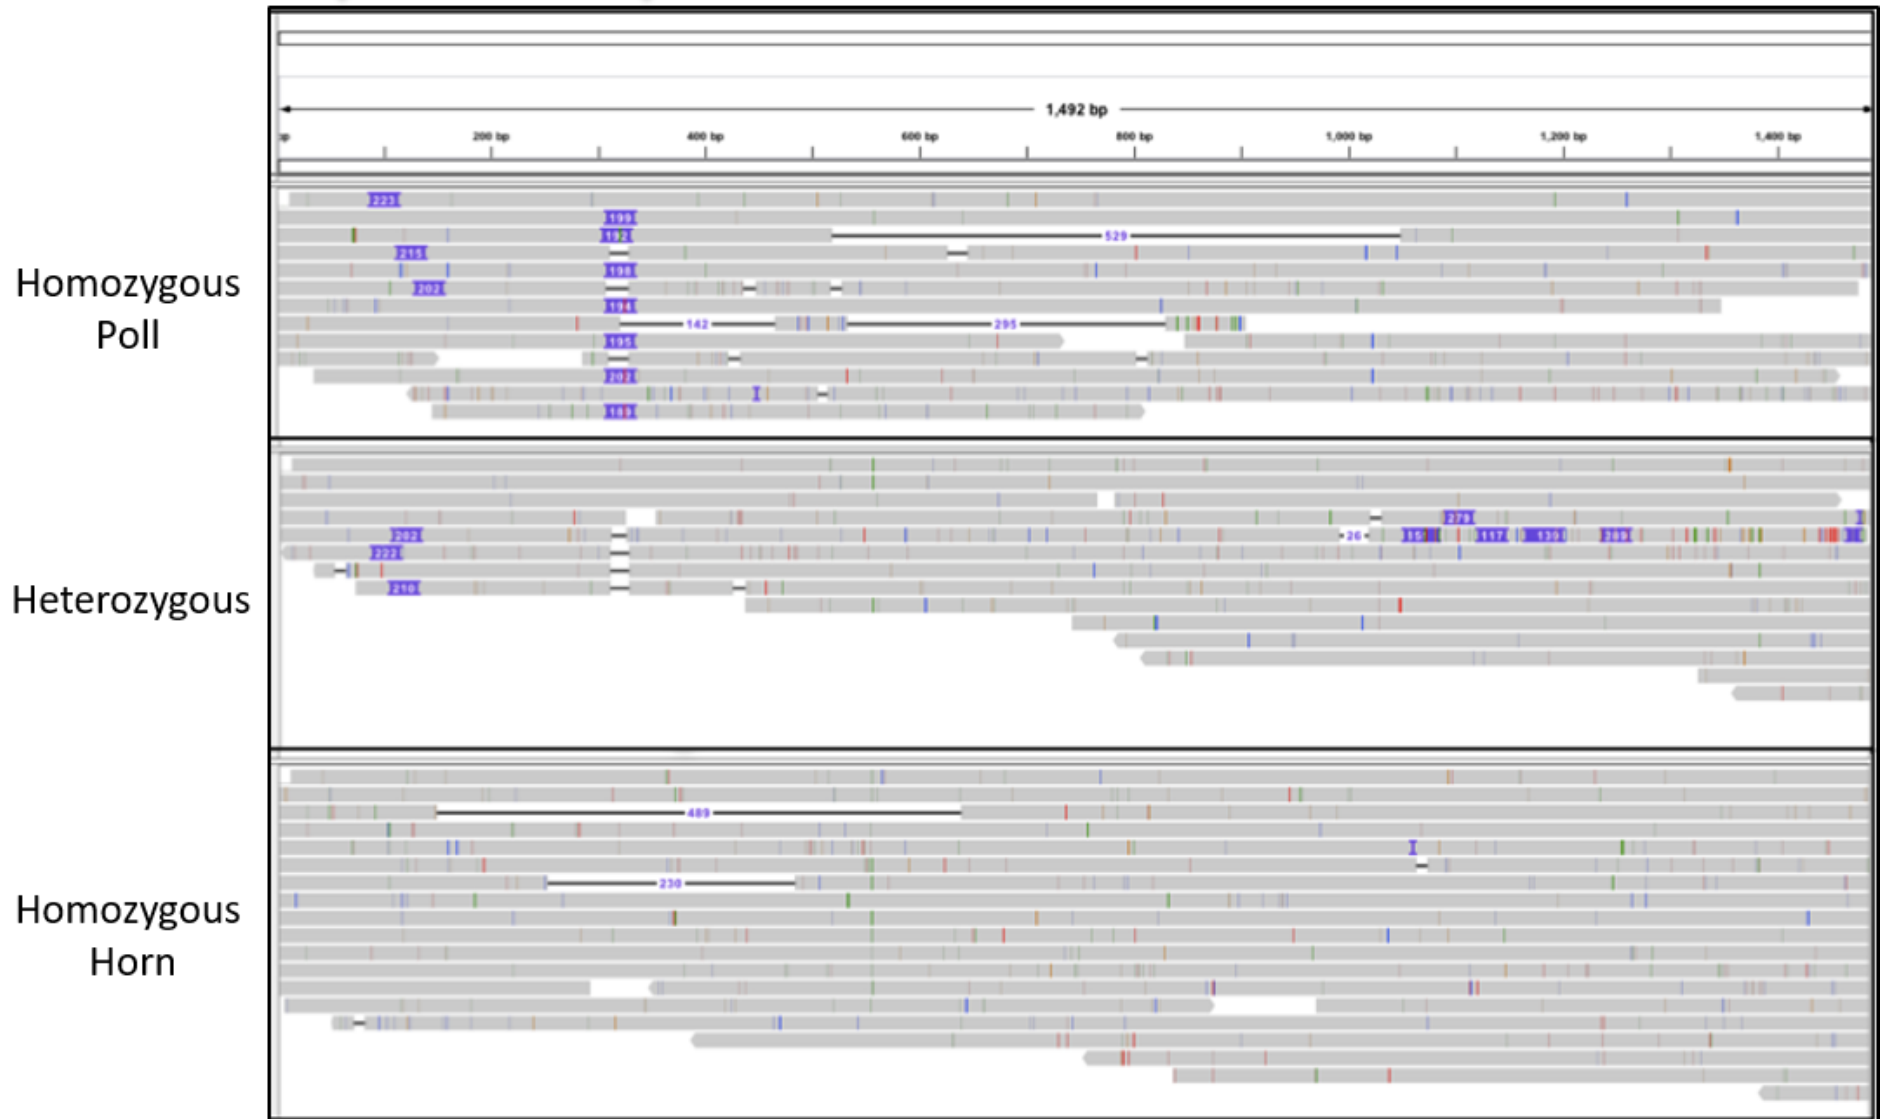

Supplement: skaa127_suppl_supplementary_material_2.pdf [file skaa127_suppl_supplementary_material_2.pdf]
